# Supplementary material for: Ethyl 2,2-difluoro-2-(2-oxo-2H-chromen-3-yl) acetate inhibits the malignant biological behaviors of colorectal cancer by restricting the phosphorylation and nuclear translocation of STAT3
Source: Research Square preprint supplement (doi:10.21203/rs.3.rs-4376706/v1), 2024-05-14
Supplement: Supplementary file 1 [file 883693f7cdf854d8ab12069b.docx]

**TABLE 1**

| **Serial No** | **Core gene** | **PDB ID** | **Binding energy (kcal/mol)** | **Binding site** |
| --- | --- | --- | --- | --- |
| **1** | **EGFR** | **4I24** | **-8.4** | **GLN-849, TRY-813** |
| **2** | **STAT3** | **6NUQ** | **-7** | **TRY-335, HIS-297, ASN-296, ALA-226** |
| **3** | **ESR1** | **3CDB** | **-7.9** | **LYS-54, GLN-105** |
| **4** | **MMP9** | **4H3X** | **-9.1** | **LEU-188** |
| **5** | **MAPK1** | **4QTA** | **-7.7** | **GLN-232, ASN-315** |
| **6** | **MAPK8** | **3ELJ** | **-7.8** | **ARG-752, GLN-711** |
| **7** | **mTOR** | **4DRI** | **-8.3** | **ASN-114** |
| **8** | **AR** | **1GS4** | **-8.6** | **SER-2035** |
| **9** | **PGR** | **1A28** | **-8.1** | **GLN-642** |
| **10** | **NR3C1** | **1NHZ** | **-6.7** | **GLN-725, ARG-766** |
